# Supplementary material for: Vitiligo prevalence and quality of life among adults in Europe, Japan and the USA
Source: PubMed Central journal article supplement — J Eur Acad Dermatol Venereol. 2022 Jun 14;36(10):1831–44. doi: 10.1111/jdv.18257 (PMC9544885; doi:10.1111/jdv.18257), 2022-06-14
Supplement: JDV-36-1831-s001.pdf [file JDV-36-1831-s001.pdf]

## Supplementary Material

Figure S1 Survey flow diagram.

### Screening Questionnaire

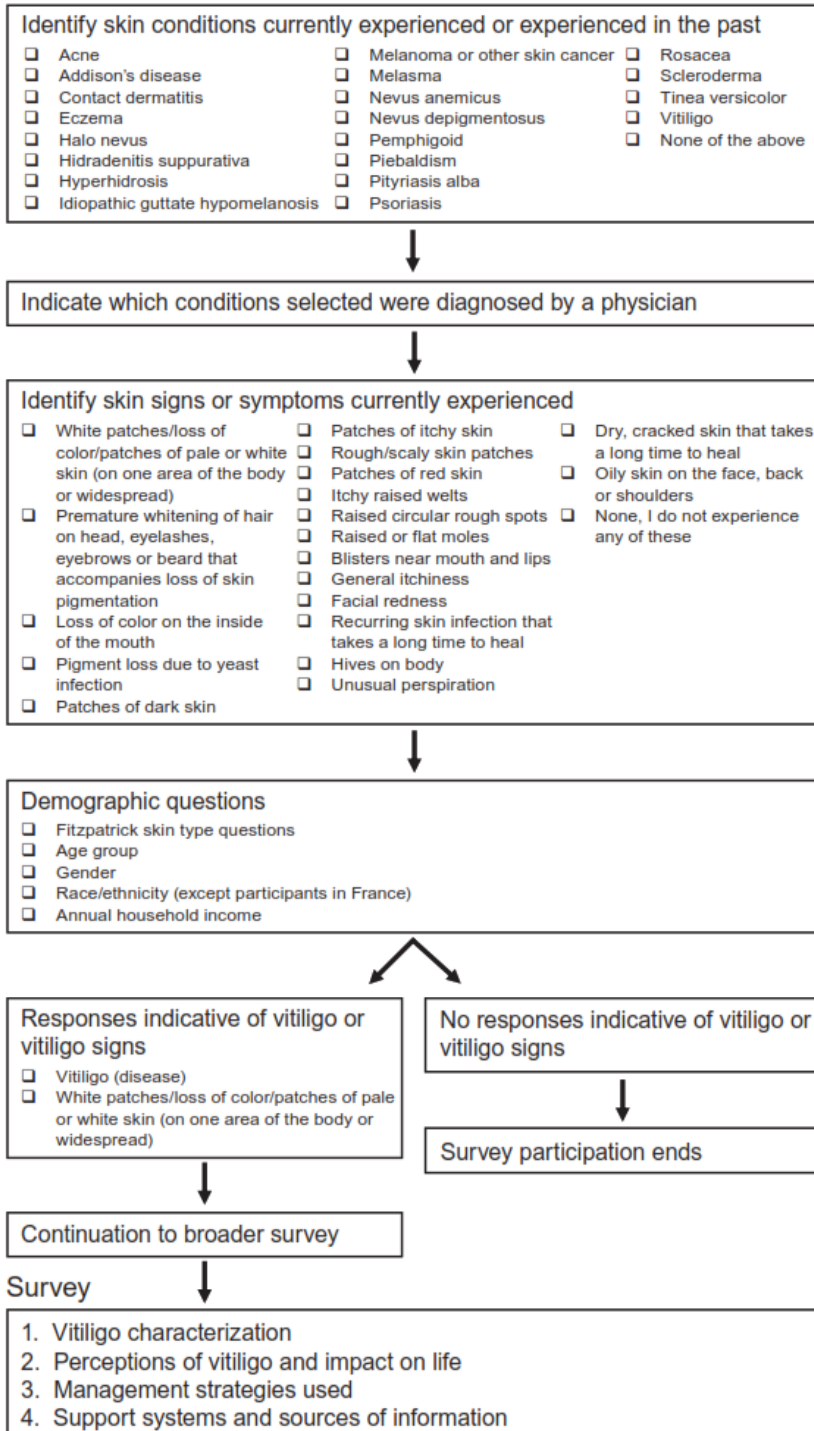

**Figure S2** Lesion site distribution among patients diagnosed with vitiligo.\*

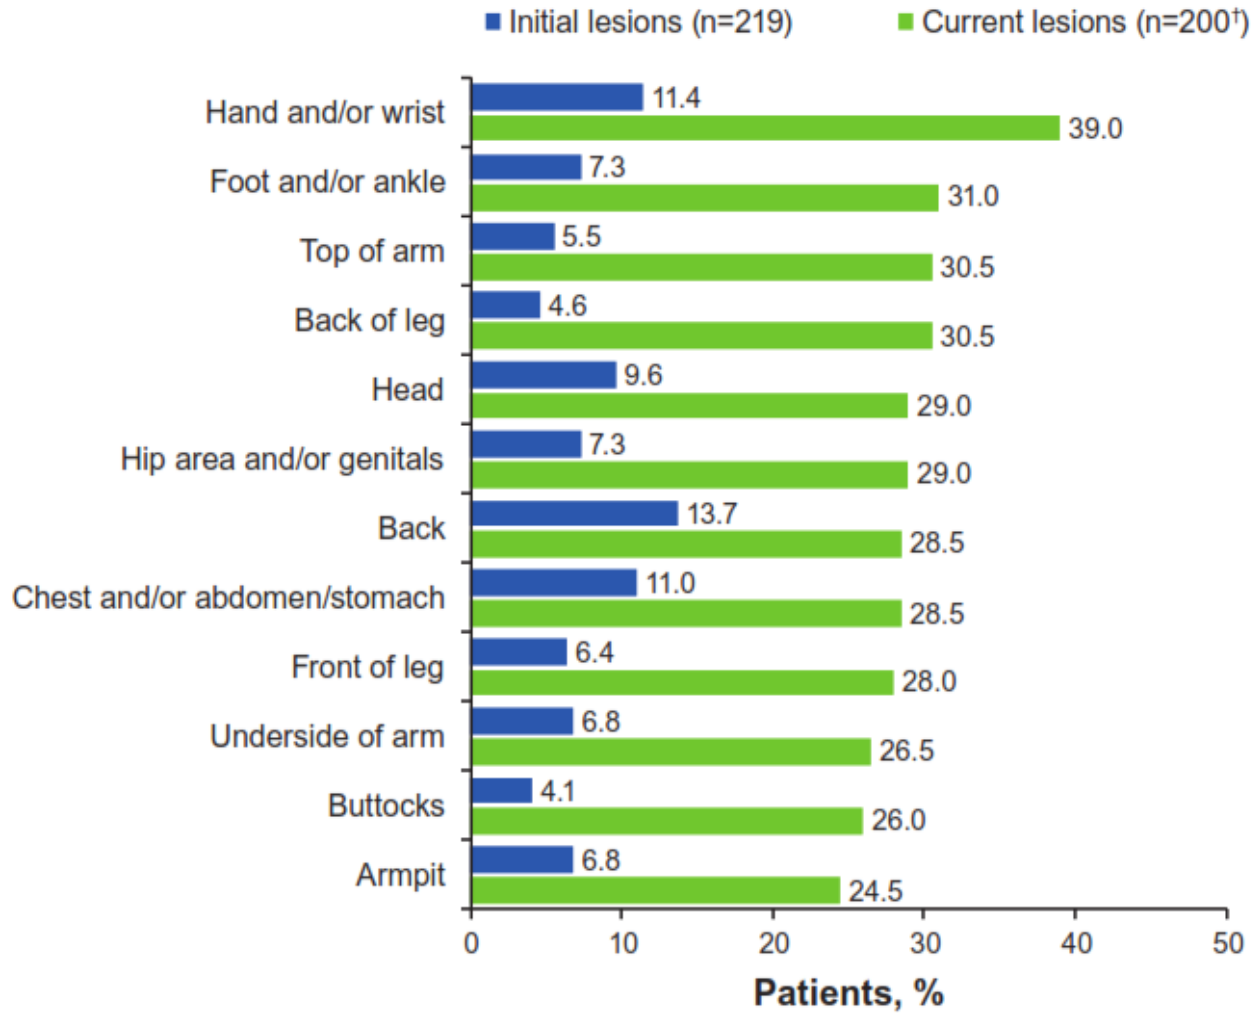

\* Patients could report lesions on multiple body regions. † 19 patients reported no current lesions.

**Figure S3** Current location of lesions within body regions.\*

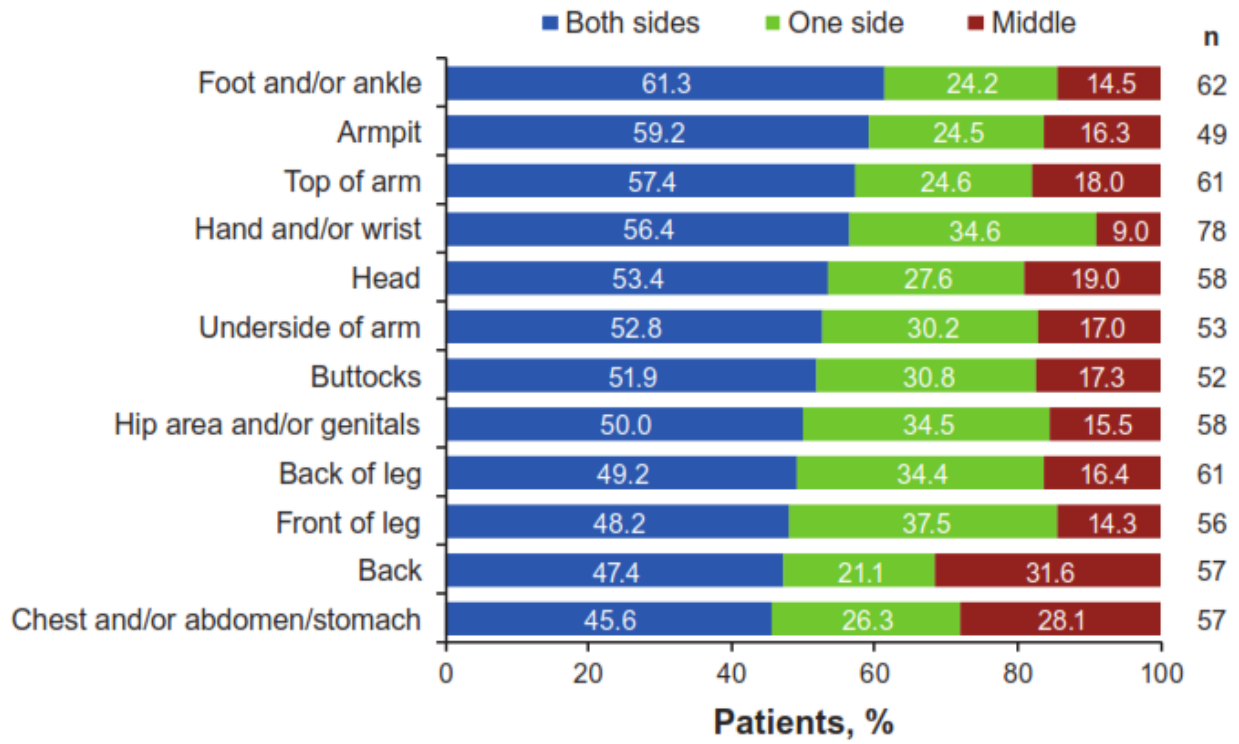

\* Patients could report lesions on multiple body regions.
